# Supplementary material
Source: MDPI journal article supplement (https://www.mdpi.com/2073-4344/11/9/1059)
Supplement: s1 [file s1]

Supplementary

# Mn-Ni-Co spinel oxides towards Oxygen Reduction Reaction in Alkaline Medium: $\text{Mn}_{0.5}\text{Ni}_{0.5}\text{Co}_2\text{O}_4/\text{C}$ synergism and cooperation

Thabo Matthews<sup>1</sup>, Tarekegn H. Dolla<sup>1</sup>, Sandile S. Gwebu<sup>1</sup>, Tebogo A. Mashola<sup>1</sup>, Lihle T. Dlamini<sup>1</sup>, Emanuela Carleschi<sup>2</sup>, Patrick Ndungu<sup>1</sup> and Nobanathi W. Maxakato<sup>1,\*</sup>

<sup>1</sup>Department of Chemical Sciences, University of Johannesburg, Doornfontein, 2028, South Africa

<sup>2</sup>Department of Chemistry, Wolaita Sodo University, Wolaita Sodo, P. O. Box 138, Ethiopia

<sup>3</sup>Department of physics University of Johannesburg, Auckland Park PO Box 524 Auckland Park 2006, South Africa

\* Correspondence: nmaxakato@uj.ac.za; Tel.: +27115596151

## S1 Experimental

### Experimental

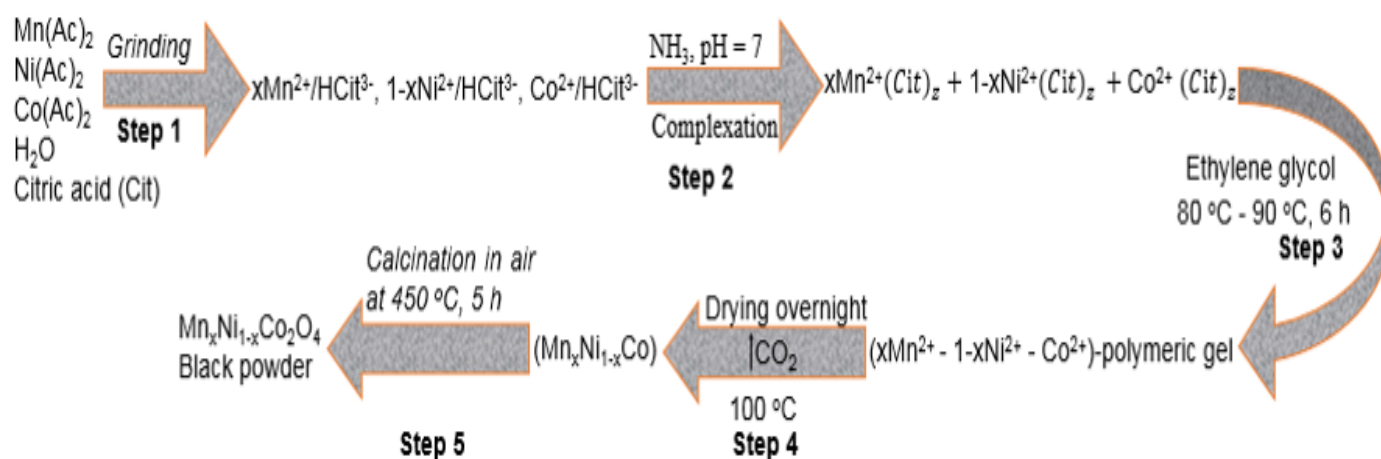

**Scheme S1.** Formation of  $\text{Mn}_x\text{Ni}_{1-x}\text{Co}_2\text{O}_4$  spinel oxide series

In Step 3, polymeric gel is formed via citrate-ethylene glycol polymerization according to the below:

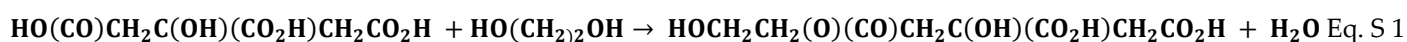

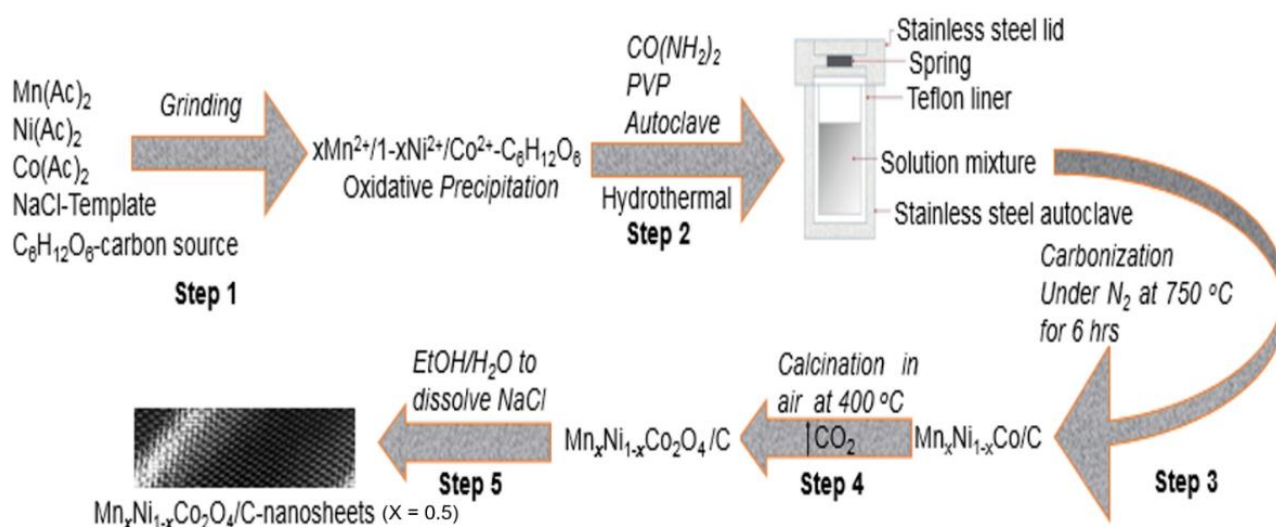

**Scheme S2.** Formation of Mn<sub>0.5</sub>Ni<sub>0.5</sub>Co<sub>2</sub>O<sub>4</sub>/C using NaCl template.

Tiny residuals of Cl are detected on all samples, as a result of the sample synthesis process and it is worth mentioning that a tiny amount of W was detected on the x=0.7 sample, Fig 4a.

*Table S1*

BEs (in eV), FWHM (in eV) and relative percentage areas (in %) of the two main components of the Ni 2p core level for the MnNiCoO series and Mn<sub>0.5</sub>Ni<sub>0.5</sub>Co<sub>2</sub>O<sub>4</sub>/C.

| Sample                                                                | BE Ni <sup>3+</sup><br>2p <sub>3/2</sub> (eV) | BE Ni <sup>2+</sup><br>2p <sub>3/2</sub> (eV) | Ni <sup>3+</sup><br>FWHM<br>(eV) | Ni <sup>2+</sup><br>FWHM<br>(eV) | Ni <sup>3+</sup><br>area (%) | Ni <sup>2+</sup><br>area (%) |
|-----------------------------------------------------------------------|-----------------------------------------------|-----------------------------------------------|----------------------------------|----------------------------------|------------------------------|------------------------------|
| x=0                                                                   | 856.17                                        | 854.45                                        | 2.7                              | 2.4                              | 57.6                         | 42.4                         |
| x=0.3                                                                 | 856.12                                        | 854.55                                        | 2.7                              | 2.4                              | 57.2                         | 42.8                         |
| x=0.5                                                                 | 856.2                                         | 854.64                                        | 2.67                             | 2.4                              | 48.2                         | 51.8                         |
| x=0.7                                                                 | 856.1                                         | 854.5                                         | 2.61                             | 2.4                              | 49                           | 51                           |
| Mn <sub>0.5</sub> Ni <sub>0.5</sub> Co <sub>2</sub> O <sub>4</sub> /C | 856.03                                        | 854.43                                        | 2.24                             | 2.24                             | 45.3                         | 54.7                         |

*Table S2*

BEs (in eV), FWHM (in eV) and relative percentage areas (in %) of the four components of the C 1s core level for the Mn<sub>0.5</sub>Ni<sub>0.5</sub>Co<sub>2</sub>O<sub>4</sub>/C sample.

| component | BE<br>(eV) | FWHM<br>(eV) | area<br>(%) |
|-----------|------------|--------------|-------------|
| C1        | 284.78     | 1.19         | 52.7        |
| C2        | 285.68     | 1.6          | 31          |
| C3        | 287.31     | 1.58         | 7.5         |
| C4        | 289.12     | 1.91         | 8.8         |

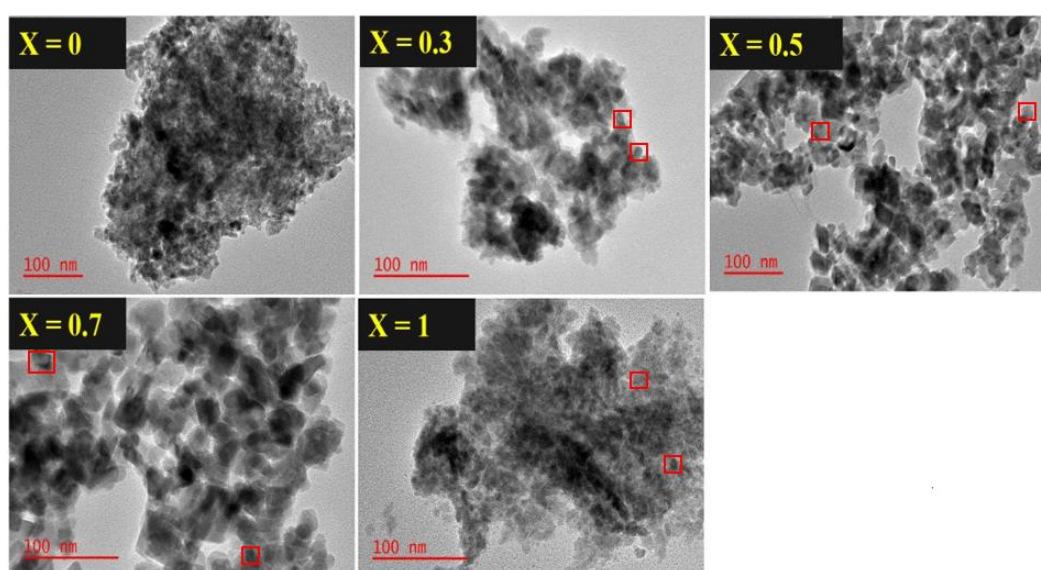

**Figure S1.** TEM images of  $\text{NiCo}_2\text{O}_4$  ( $x = 0$ ),  $\text{Mn}_{0.3}\text{Ni}_{0.7}\text{Co}_2\text{O}_4$  ( $x = 0.3$ ),  $\text{Mn}_{0.5}\text{Ni}_{0.5}\text{Co}_2\text{O}_4$  ( $x = 0.5$ ),  $\text{Mn}_{0.7}\text{Ni}_{0.3}\text{Co}_2\text{O}_4$  ( $x = 0.7$ ) and  $\text{MnCo}_2\text{O}_4$  ( $x = 1$ ).

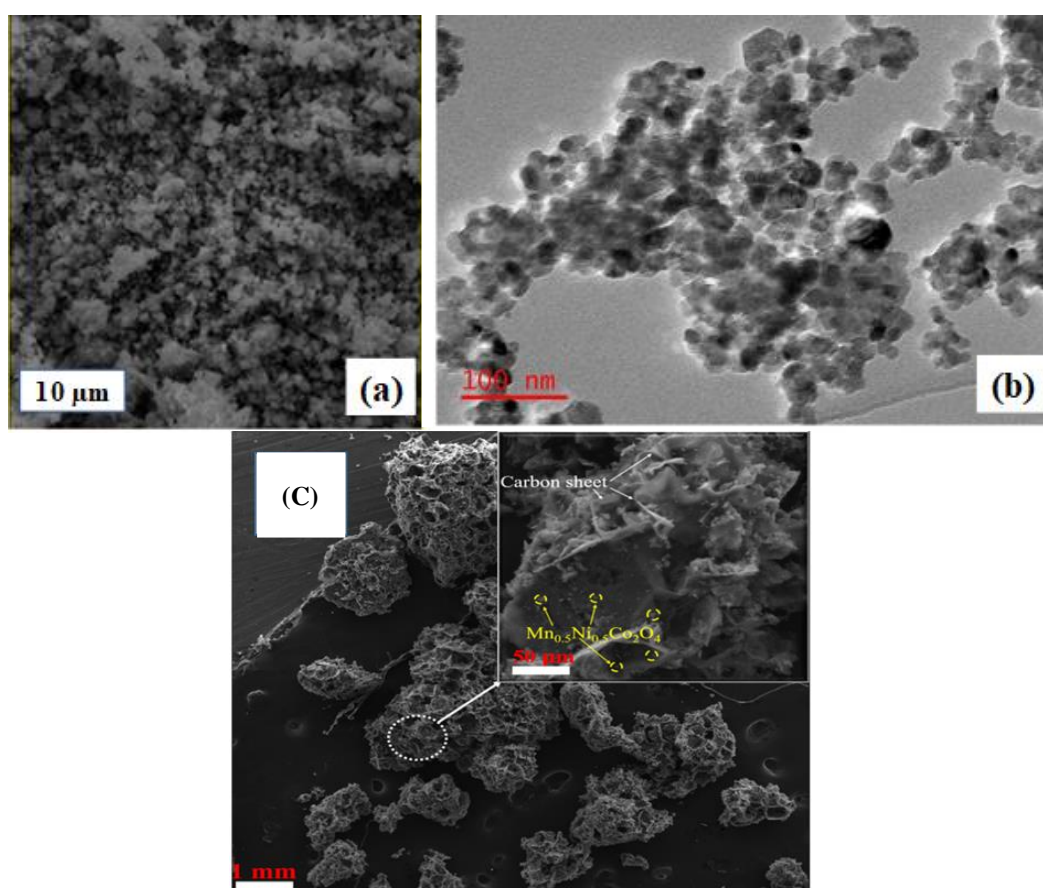

**Figure S2.** (a,c)  $\text{Mn}_{0.5}\text{Ni}_{0.5}\text{Co}_2\text{O}_4$  and  $\text{Mn}_{0.5}\text{Ni}_{0.5}\text{Co}_2\text{O}_4/\text{C}$  SEM image respectively, and (b) TEM image

**Oxygen reduction reaction proposed mechanism:**

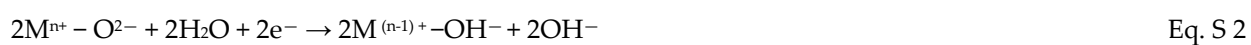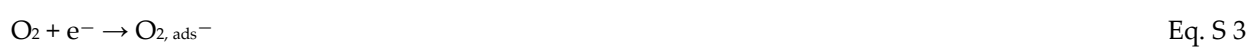

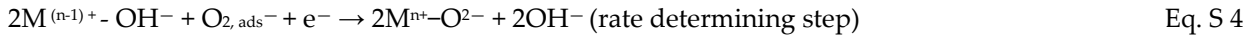

Or then again with the more noteworthy likelihood

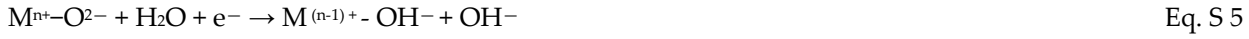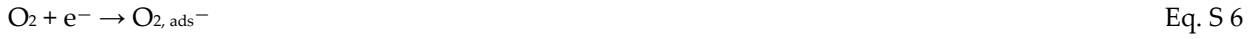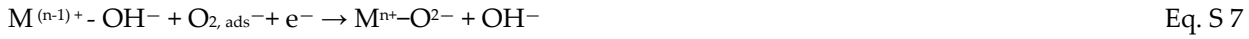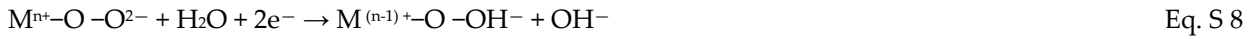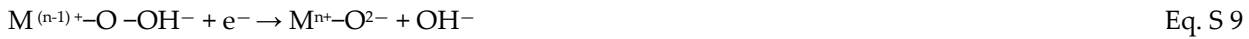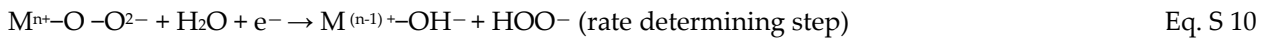

With the above-proposed mechanism, the synthesized  $Mn_xNi_{1-x}Co_2O_4$  spinel series follows [1,2]:

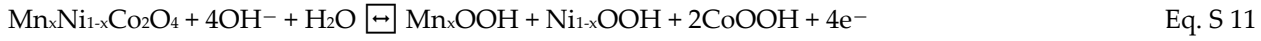

For simplicity, note the metallic ratios have been deliberately left out in the following equations:

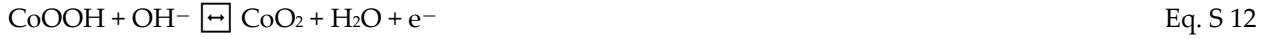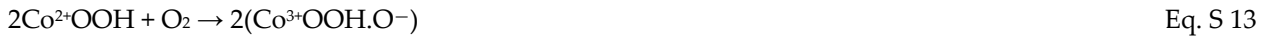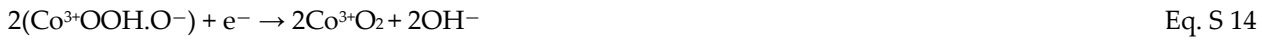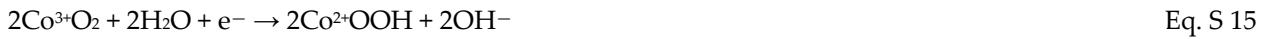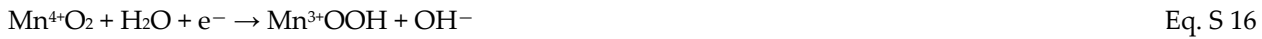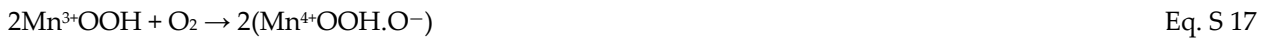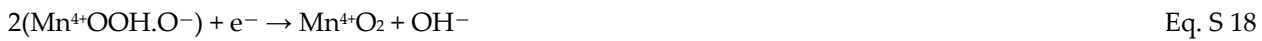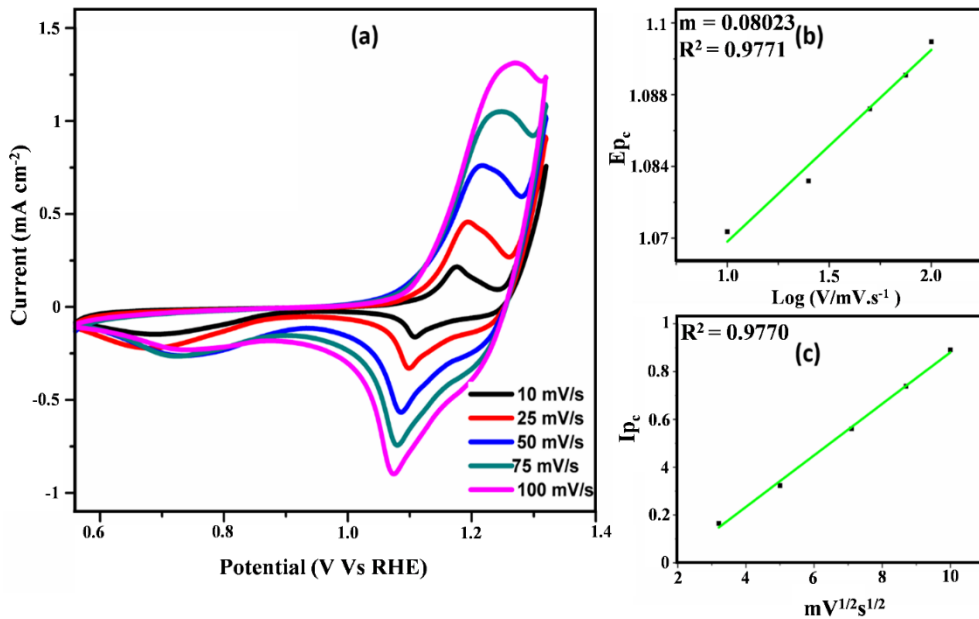

**Figure S3.** (a) Scan rate studies of  $\text{NiCo}_2\text{O}_4$  electro-catalyst in  $\text{O}_2$ -saturated 0.1 M KOH at different scan rates, 10-100 mV/s (b) Peak current dependence on the scan rate (c) Peak potential dependence on the logarithmic value of scan rate.

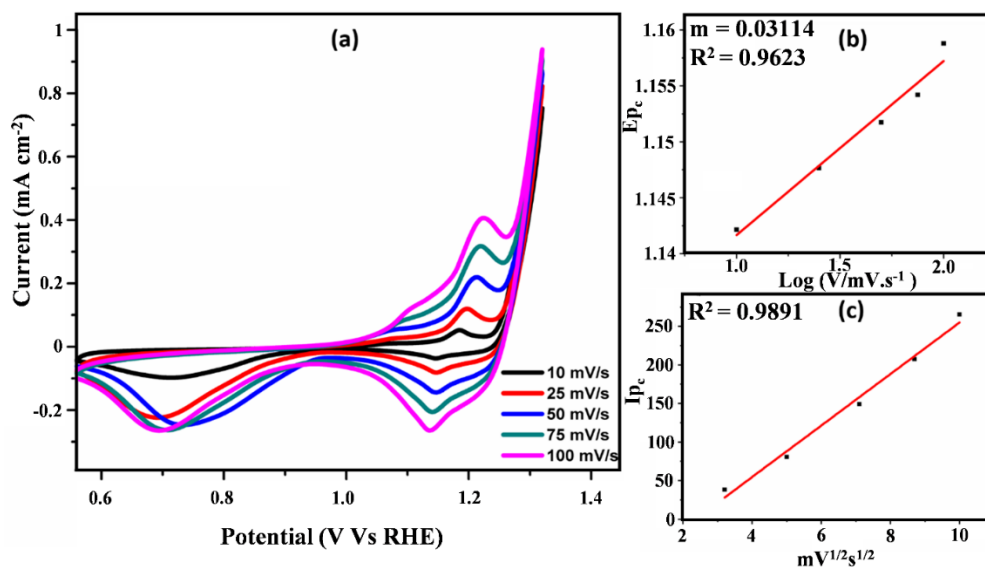

**Figure S4.** (a) Scan rate studies of  $\text{Mn}_{0.3}\text{Ni}_{0.7}\text{Co}_2\text{O}_4$  electro-catalyst in  $\text{O}_2$ -saturated 0.1 M KOH at different scan rates, 10-100 mV/s (b) Peak current dependence on the scan rate (c) Peak potential dependence on the logarithmic value of scan rate.

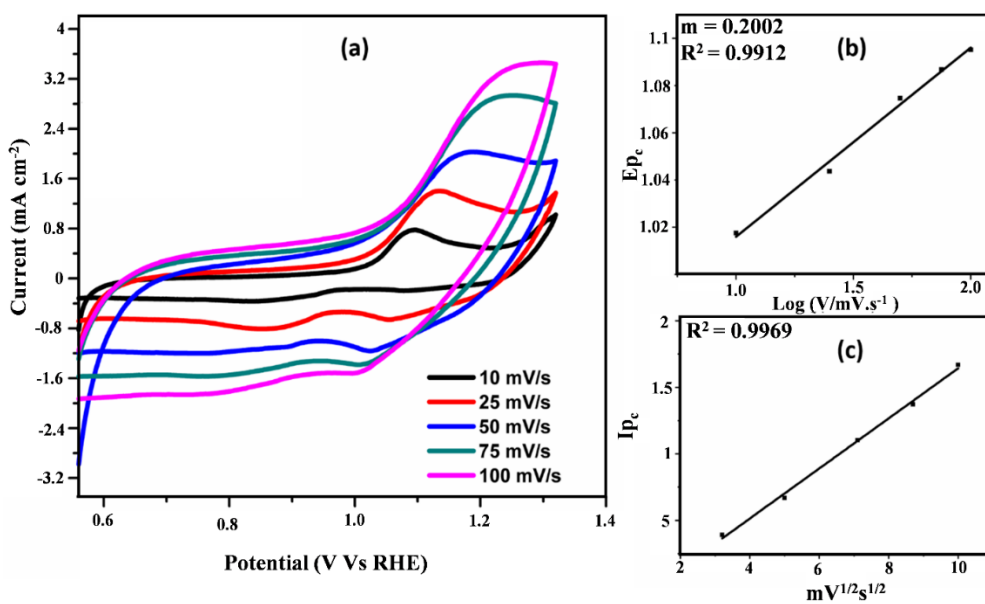

**Figure S5.** (a) Scan rate studies of  $\text{Mn}_{0.5}\text{Ni}_{0.5}\text{Co}_2\text{O}_4$  electro-catalyst in  $\text{O}_2$ -saturated 0.1 M KOH at different scan rates, 10-100 mV/s (b) Peak current dependence on the scan rate (c) Peak potential dependence on the logarithmic value of scan rate.

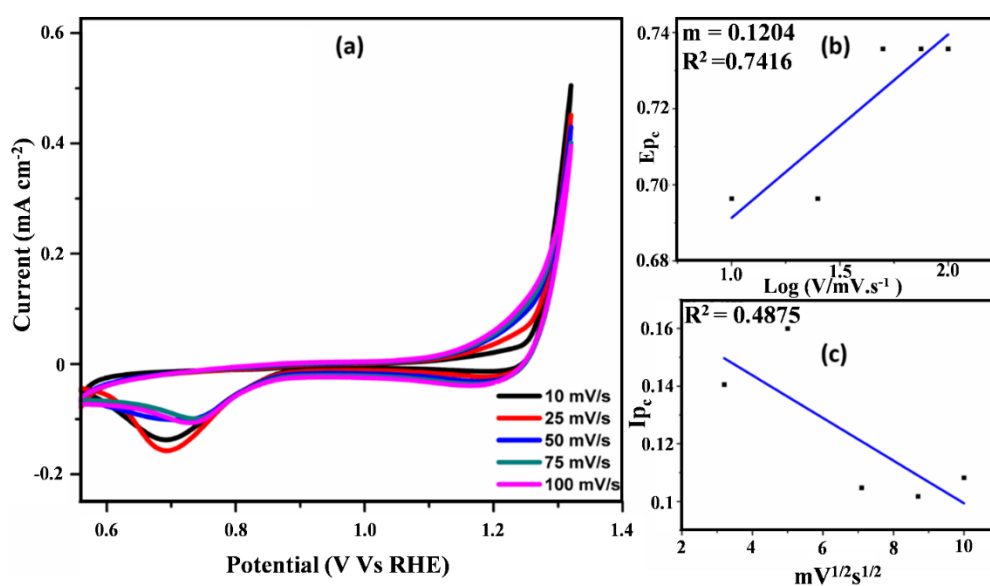

**Figure S6.** (a) Scan rate studies of Mn<sub>0.7</sub>Ni<sub>0.3</sub>Co<sub>2</sub>O<sub>4</sub> electro-catalyst in O<sub>2</sub>-saturated 0.1 M KOH at different scan rates, 10-100 mV/s (b) Peak current dependence on the scan rate (c) Peak potential dependence on the logarithmic value of scan rate.

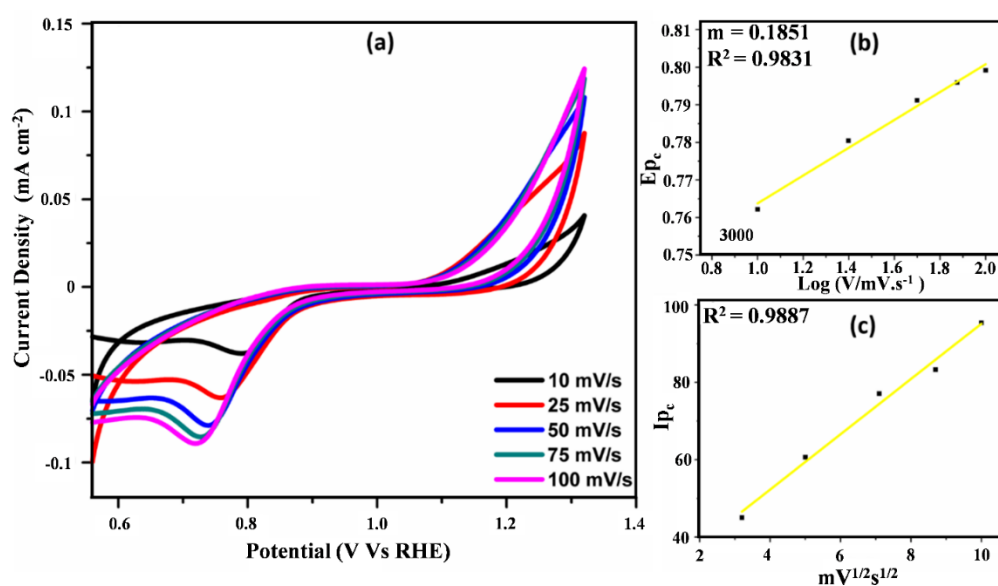

**Figure S7.** (a) Scan rate studies of MnCo<sub>2</sub>O<sub>4</sub> electro-catalyst in O<sub>2</sub>-saturated 0.1 M KOH at different scan rates, 10-100 mV/s (b) Peak current dependence on the scan rate (c) Peak potential dependence on the logarithmic value of scan rate.

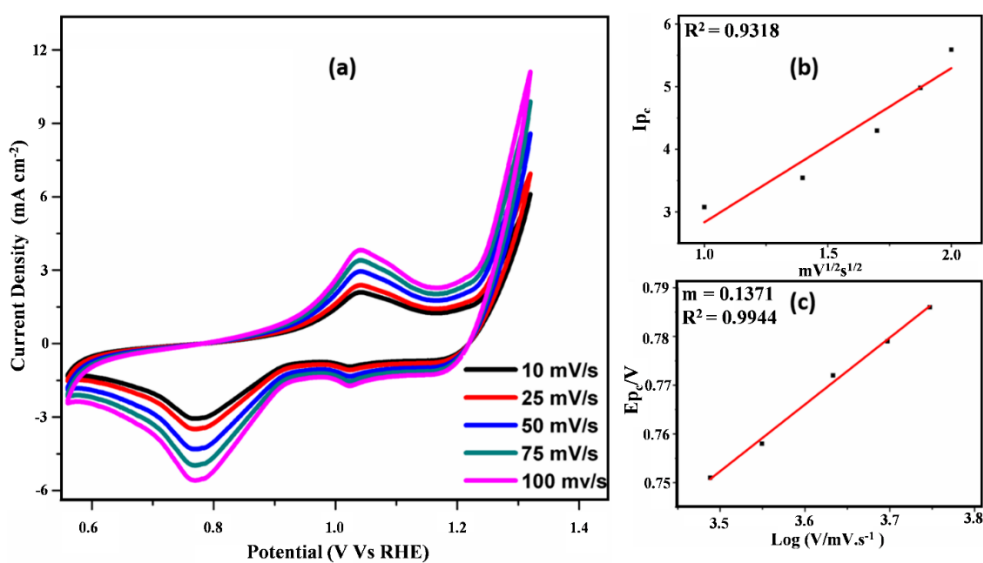

**Figure S8.** (a) Scan rate studies of  $\text{Mn}_{0.5}\text{Ni}_{0.5}\text{Co}_2\text{O}_4/\text{C}$  electro-catalyst in  $\text{O}_2$ -saturated 0.1 M KOH at different scan rates, 10-100 mV/s (b) Peak current dependence on the scan rate (c) Peak potential dependence on the logarithmic value of scan rate.

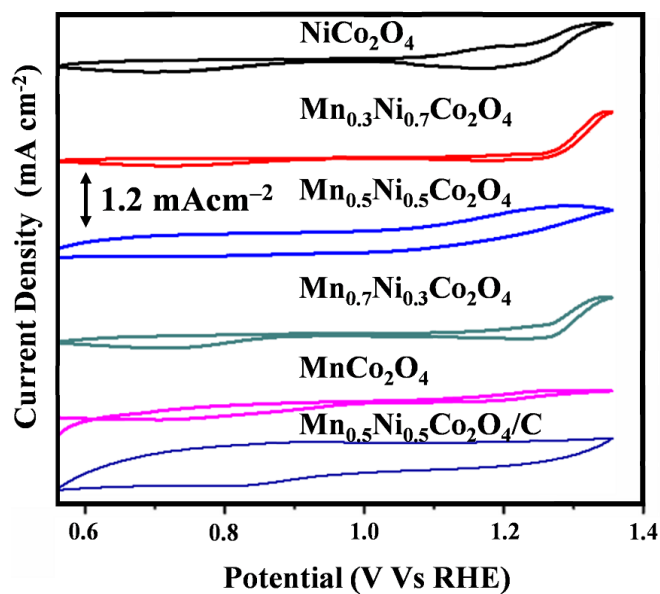

**Figure S9:** Cyclic Voltammetry in  $\text{N}_2$ -saturated 0.1 M KOH at  $50 \text{ mV s}^{-1}$  for  $\text{Mn}_x\text{Ni}_{1-x}\text{Co}_2\text{O}_4$  ( $x = 0, 0.3, 0.5, 0.7$ , and 1) and  $\text{Mn}_{0.5}\text{Ni}_{0.5}\text{Co}_2\text{O}_4/\text{C}$ .



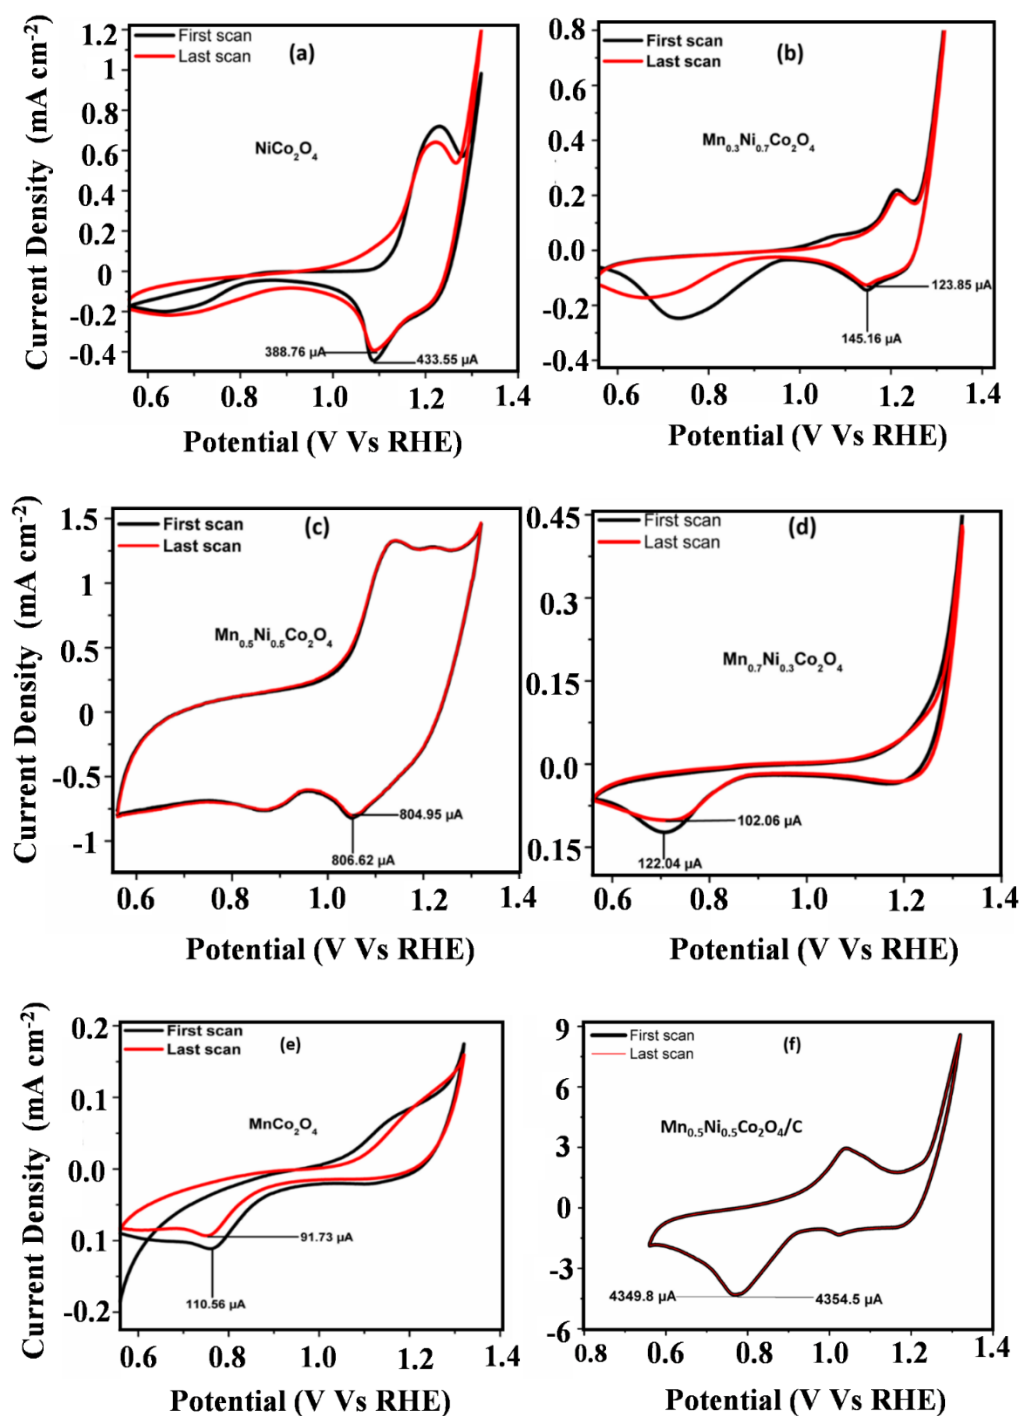

**Figure S10.** Durability test (405 scans) in O<sub>2</sub>-saturated 0.1 M KOH at 50 mVs<sup>-1</sup> (a) NiCo<sub>2</sub>O<sub>4</sub> (b) Mn<sub>0.3</sub>Ni<sub>0.7</sub>Co<sub>2</sub>O<sub>4</sub> (c) Mn<sub>0.5</sub>Ni<sub>0.5</sub>Co<sub>2</sub>O<sub>4</sub> (d) Mn<sub>0.7</sub>Ni<sub>0.3</sub>Co<sub>2</sub>O<sub>4</sub> (e) MnCo<sub>2</sub>O<sub>4</sub> (f) Mn<sub>0.5</sub>Ni<sub>0.5</sub>Co<sub>2</sub>O<sub>4</sub>/C.



Table S3.

Electrocatalytic performance of the synthesized electro-catalysts for the oxygen reduction reaction and percentage current loss as calculated from cyclic voltammogram data.

| Electro-catalysts       | NiCo <sub>2</sub> O <sub>4</sub> | Mn <sub>0.3</sub> Ni <sub>0.7</sub> Co <sub>2</sub> O <sub>4</sub> | Mn <sub>0.5</sub> Ni <sub>0.5</sub> Co <sub>2</sub> O <sub>4</sub> | Mn <sub>0.7</sub> Ni <sub>0.3</sub> Co <sub>2</sub> O <sub>4</sub> | MnCo <sub>2</sub> O <sub>4</sub> | Mn <sub>0.5</sub> Ni <sub>0.5</sub> Co <sub>2</sub> O <sub>4</sub> /C |
|-------------------------|----------------------------------|--------------------------------------------------------------------|--------------------------------------------------------------------|--------------------------------------------------------------------|----------------------------------|-----------------------------------------------------------------------|
| Tafel slope, b (mV/dec) | 0.161                            | 0.0623                                                             | 0.400                                                              | 0.241                                                              | 0.370                            | 0.274                                                                 |
| *Current loss (%)       | 12.30                            | 14.68                                                              | 0.21                                                               | 16.37                                                              | 17.03                            | 0.11                                                                  |

$$m = \frac{b}{2}, \text{ b Tafel slope}$$

Tafel slopes values for the cathodes were calculated from the linear fitting results of scan rate

$$\text{*Current loss (\%)} = \frac{\text{First scan peak current (\mu A)}}{\text{last scan peak current (\mu A)}} \times 100\%$$

Table S3.

Comparison of oxygen reduction reaction electroactivities of electrocatalyst in this work with reported electrocatalysts.

| Spinel                                             | Synthesis method                    | Feature/strategies                                          | Reaction medium      | <sup>a</sup> E <sub>1/2</sub> (V) | <sup>b,c</sup> Current density (mA/cm <sup>2</sup> ) | Stability (Chronoamperometric current loss) | Ref |
|----------------------------------------------------|-------------------------------------|-------------------------------------------------------------|----------------------|-----------------------------------|------------------------------------------------------|---------------------------------------------|-----|
| Cu <sub>x</sub> Co <sub>3-x</sub> O <sub>4</sub>   | one-step hydrothermal               | Encapsulation in carbon nanomaterials more oxygen vacancies | Alkaline (0.1 M KOH) | 0.82                              | ~6.3                                                 | 12.32% after 12000s                         | [1] |
| CoIn <sub>2</sub> Se <sub>4</sub>                  | polyol solution reduction           | abundant active sites and ideal charge transfer             | Alkaline (0.1 M KOH) | 0.77                              | ~5.0                                                 | --                                          | [2] |
| CoCuMnO <sub>x</sub>                               | modified sacrificial template       | single-phase multiple functionality                         | Alkaline (0.1 M KOH) | ~0.83                             | ~6.2                                                 | ~10% after 10000s                           | [3] |
| CoFe <sub>2</sub> O <sub>4</sub> /carbon nano-tube | solvothermal and calcination        | coupling effect                                             | Alkaline (0.1 M KOH) | 0.808                             | ~5.4                                                 | 5.41% after 20000s                          | [4] |
| CoIn <sub>2</sub> S <sub>4</sub> /S-rGO            | in situ solvothermal growth process | open and porous hierarchical structure                      | Alkaline (0.1 M KOH) | 0.83                              | ~ 5.8                                                | 17.8% after 5000s                           | [5] |

|                                                                       |                                       |                                        |                      |        |       |       |           |
|-----------------------------------------------------------------------|---------------------------------------|----------------------------------------|----------------------|--------|-------|-------|-----------|
| Fe-Co/N,S-MPC                                                         | microwave-assisted hydrothermal route | Support material heteroatom doping     | Alkaline (0.1 M KOH) | 0.78   | ~4.25 | -     | [6]       |
| AlCoMn                                                                | Metal-melt-spinning                   | Dealloying                             | Alkaline (0.1 M KOH) | ~0.80  | ~6.1  | -     | [7]       |
| Co <sub>0.5</sub> Fe <sub>0.5</sub> S <sub>4</sub>                    | facile soft template                  | coupling interaction and encapsulation | Alkaline (0.1 M KOH) | ~0.808 | ~6.4  | 11%   | [8]       |
| CoV <sub>2-x</sub> Fe <sub>x</sub> O <sub>4</sub>                     | Thermal decomposition                 | Cationic substitution                  | Alkaline (1 M KOH)   | ~0.9   | ~3.65 | -     | [9]       |
| Mn <sub>0.5</sub> Ni <sub>0.5</sub> Co <sub>2</sub> O <sub>4</sub> /C | template assisted citrate sol-gel     | synergism and metallic cooperation     | Alkaline (1 M KOH)   | 0.856  | 5.54  | 11.4% | This work |

- Kumar, R.; Singh, L.; Wahid, Z.A.; Mahapatra, D.M.; Liu, H. Novel mesoporous MnCo<sub>2</sub>O<sub>4</sub> nanorods as oxygen reduction catalyst at neutral pH in microbial fuel cells. *Bioresour. Technol.* **2018**, *254*, 1–6, doi:10.1016/j.biortech.2018.01.053.
- Ko, T.H.; Radhakrishnan, S.; Seo, M.K.; Khil, M.S.; Kim, H.Y.; Kim, B.S. A green and scalable dry synthesis of NiCo<sub>2</sub>O<sub>4</sub>/graphene nanohybrids for high-performance supercapacitor and enzymeless glucose biosensor applications. *J. Alloys Compd.* **2017**, *696*, 193–200, doi:10.1016/j.jallcom.2016.11.234.
- Jin, W.; Chen, J.; Wu, Z.; Maduraiveeran, G. Encapsulated spinel CuXCo<sub>3</sub>-XO<sub>4</sub> in carbon nanotubes as efficient and stable oxygen electrocatalysts. *Int. J. Hydrogen Energy* **2019**, *44*, 11421–11430, doi:10.1016/j.ijhydene.2019.03.093.
- Wang, J.; Zheng, X.; Cao, Y.; Li, L.; Zhong, C.; Deng, Y.; Han, X.; Hu, W. Developing Indium-based Ternary Spinel Selenides for Efficient Solid Flexible Zn-Air Batteries and Water Splitting. *ACS Appl. Mater. Interfaces* **2020**, *12*, 8115–8123, doi:10.1021/acsami.9b18304.
- Huang, K.; Liu, J.; Wang, L.; Chang, G.; Wang, R.; Lei, M.; Wang, Y.; He, Y. Mixed valence CoCuMnOx spinel nanoparticles by sacrificial template method with enhanced ORR performance. *Appl. Surf. Sci.* **2019**, *487*, 1145–1151, doi:10.1016/j.apsusc.2019.05.183.
- Huang, Q.; Li, C.; Tu, Y.; Jiang, Y.; Mei, P.; Yan, X. Spinel CoFe<sub>2</sub>O<sub>4</sub> /carbon nanotube composites as efficient bifunctional electrocatalysts for oxygen reduction and oxygen evolution reaction. *Ceram. Int.* **2021**, *47*, 1602–1608, doi:10.1016/j.ceramint.2020.08.276.
- Fu, G.; Wang, J.; Chen, Y.; Liu, Y.; Tang, Y.; Goodenough, J.B.; Lee, J.M. Exploring Indium-Based Ternary Thiospinel as Conceivable High-Potential Air-Cathode for Rechargeable Zn–Air Batteries. *Adv. Energy Mater.* **2018**, *8*, 1–12, doi:10.1002/aenm.201802263.
- Kostuch, A.; Gryboś, J.; Wierzbicki, S.; Sojka, Z.; Kruczała, K. Selectivity of mixed iron-cobalt spinels deposited

on a n,s-doped mesoporous carbon support in the oxygen reduction reaction in alkaline media. *Materials (Basel)*. **2021**, *14*, 1–19, doi:10.3390/ma14040820.

9. Li, S.; Zhou, X.; Fang, G.; Xie, G.; Liu, X.; Lin, X.; Qiu, H.J. Multicomponent Spinel Metal Oxide Nanocomposites as High-Performance Bifunctional Catalysts in Zn-Air Batteries. *ACS Appl. Energy Mater.* **2020**, *3*, 7710–7718, doi:10.1021/acsaem.0c01121.
10. Shen, M.; Ruan, C.; Chen, Y.; Jiang, C.; Ai, K.; Lu, L. Covalent entrapment of cobalt-iron sulfides in N-doped mesoporous carbon: Extraordinary bifunctional electrocatalysts for oxygen reduction and evolution reactions. *ACS Appl. Mater. Interfaces* **2015**, *7*, 1207–1218, doi:10.1021/am507033x.
11. Chakrapani, K.; Bendt, G.; Hajiyani, H.; Lunkenbein, T.; Greiner, M.T.; Masliuk, L.; Salamon, S.; Landers, J.; Schlögl, R.; Wende, H.; et al. The Role of Composition of Uniform and Highly Dispersed Cobalt Vanadium Iron Spinel Nanocrystals for Oxygen Electrocatalysis. *ACS Catal.* **2018**, *8*, 1259–1267, doi:10.1021/acscatal.7b03529.
